# Supplementary material
Source: Springer Nature journal article supplement (https://www.springermedizin.de/resource/supplementary/12943_2011_998_MOESM4_ESM.PDF/9552040)
Supplement: MOESM4 [file 9552040]

**Additional file 4:**

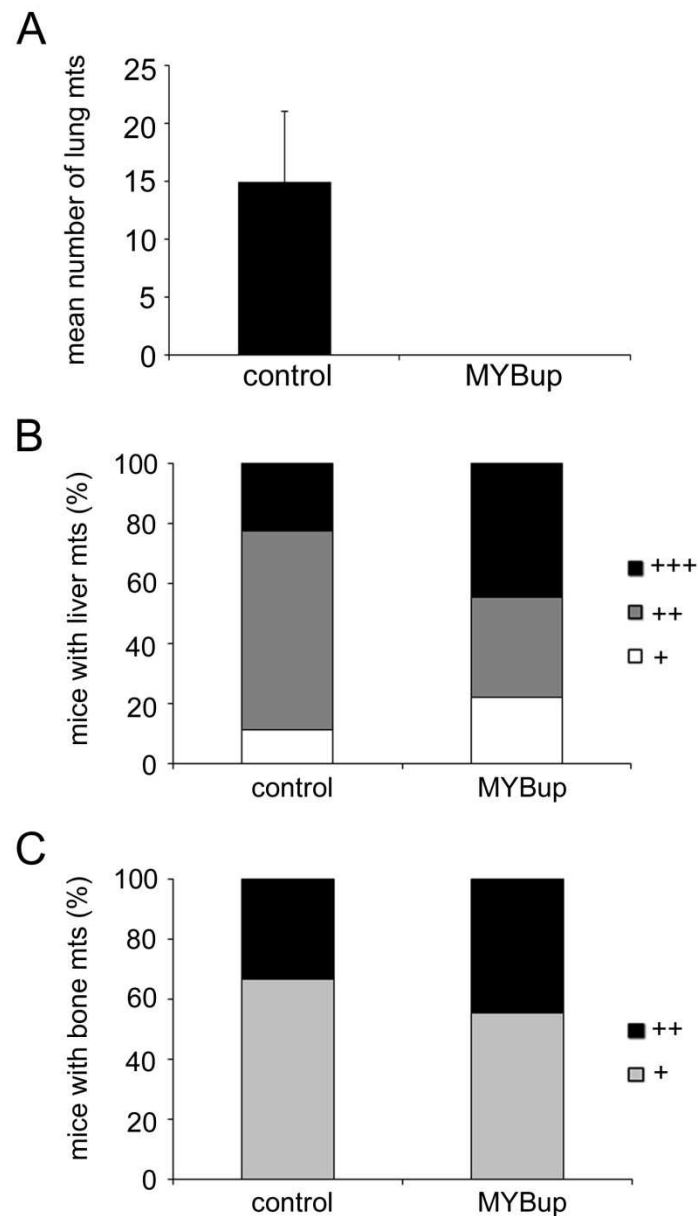

**Figure S4. Histological examination of lungs, liver and bones of BALB/c mice orthotopically injected with *c-myb* overexpressing (MYBup) or control 4T1 cells.** Lungs were fixed in Bouin's solution. Liver and bones were harvested and fixed in 10% buffered formalin. Tissues were processed for paraffin embedding, sectioned, and stained with hematoxylin and eosin (H&E). Bones were decalcified overnight before embedding. **(A)** The mean number of pulmonary metastatic lesions as determined by histological examination. Every 10th consecutive section was examined for the presence of metastases (mts). **(B)** Semi-quantitative evaluation of liver metastasis: + rare microscopic neoplastic lesions, ++ numerous microscopic lesion, +++ numerous extensive neoplastic lesions. **(C)** Semi-quantitative evaluation of skeletal metastasis: + epithelial tumor cell infiltration and bone destruction, ++ tumor cell infiltration and bone destruction with the invasion of soft tissues.
